# Supplementary material
Source: publisher figshare collection journal article supplement (https://karger.figshare.com/ndownloader/files/28409802)
Supplement: Supplementary file 1 [file 28409802]

**S. Table 6.** Meta-analysis of proportion of mortality among overall COVID-19 positive patients across different studies.

| **Study** | **Event/Sample size** | **Proportion (%) (95% CI)** | **Random Weight (%)** |
| --- | --- | --- | --- |
| **Aggarwal, S et al., 2020** | 10/16 | 62.5% (35.44% - 84.8%) | 3.36 |
| **Arentz, M et al., 2020** | 11/21 | 52.38% (29.78% - 74.29%) | 3.53 |
| **Chen, N et al., 2020** | 11/99 | 11.11% (5.68% - 19.01%) | 4.06 |
| **Chen, T et al., 2020** | 26/203 | 12.81% (8.54% - 18.2%) | 4.16 |
| **Cummmings, MJ et al., 2020** | 101/257 | 39.3% (33.29% - 45.56%) | 4.17 |
| **Deng, Y et al., 2020** | 109/225 | 48.44% (41.75% - 55.18%) | 4.16 |
| **Derespina, K et al., 2020** | 2/70 | 2.86% (0.35% - 9.94%) | 4 |
| **Guan, W et al., 2020** | 15/1,099 | 1.37% (0.77% - 2.24%) | 4.23 |
| **Guqin, Z et al., 2020** | 12/221 | 5.43% (2.84% - 9.29%) | 4.16 |
| **Hong, KS et al., 2020** | 5/98 | 5.1% (1.68% - 11.51%) | 4.06 |
| **Huang, C et al., 2020** | 6/41 | 14.63% (5.57% - 29.17%) | 3.84 |
| **ICNARC et al., 2020** | 3987/8,891 | 44.84% (43.81% - 45.88%) | 4.24 |
| **Jamie, H et al., 2020** | 888/4,168 | 21.31% (20.07% - 22.58%) | 4.24 |
| **Ling, L et al., 2020** | 1/8 | 12.5% (0.32% - 52.65%) | 2.84 |
| **Luo, X et al., 2020** | 100/403 | 24.81% (20.67% - 29.33%) | 4.2 |
| **Ruan, Q et al., 2020** | 68/150 | 45.33% (37.2% - 53.66%) | 4.12 |
| **Wang, L et al., 2020** | 7/116 | 6.03% (2.46% - 12.04%) | 4.09 |
| **Wu, C et al., 2020** | 44/201 | 21.89% (16.38% - 28.25%) | 4.15 |
| **Xin-Ying, Z et al., 2020** | 2/91 | 2.2% (0.27% - 7.72%) | 4.05 |
| **Xu, J et al., 2020** | 147/239 | 61.51% (55.02% - 67.71%) | 4.17 |
| **Xu, S et al., 2020** | 32/355 | 9.01% (6.25% - 12.49%) | 4.19 |
| **Xu, Y et al., 2020** | 1/45 | 2.22% (0.06% - 11.77%) | 3.87 |
| **Yi, Z et al., 2020** | 0/34 | 0% (0% - 10.28%) | 3.77 |
| **Yu, Y et al., 2020** | 87/226 | 38.5% (32.12% - 45.18%) | 4.16 |
| **Zhen, L et al., 2020** | 32/193 | 16.58% (11.63% - 22.59%) | 4.15 |
| **Total (random effects)** | 5,703/17,470 | 19.35% (12.40% - 27.42%) | 100 |
